# Supplementary material
Source: PubMed Central journal article supplement (PMC8721785)
Supplement: Supplementary_material_2.pdf [file Supplementary_material_2.pdf]

**Supplemental Table 2.** Infiltration (n=495)<sup>a</sup> characteristics.

| <b>Infiltration Characteristic</b>                           | <b>Number (%) or Mean (± SD)</b> |
|--------------------------------------------------------------|----------------------------------|
| <b>Anatomic Location (n=442)</b>                             |                                  |
| Upper Extremity, Without Hand                                | 309 (70.0%)                      |
| Hand                                                         | 87 (19.7%)                       |
| Lower Extremity                                              | 36 (8.1%)                        |
| Scalp                                                        | 7 (1.6%)                         |
| Neck                                                         | 2 (0.5%)                         |
| Breast                                                       | 1 (0.2%)                         |
| <b>Laterality (n=451)</b>                                    |                                  |
| Left                                                         | 206 (45.7%)                      |
| Right                                                        | 238 (52.8%)                      |
| N/A                                                          | 7 (1.6%)                         |
| <b>Medications (n=447)</b>                                   |                                  |
| IV Hydration with or without electrolytes                    | 112 (25.1%)                      |
| Antimicrobials                                               | 101 (22.6%)                      |
| CT Contrast                                                  | 83 (18.6%)                       |
| Vasopressors                                                 | 34 (7.6%)                        |
| Anesthetics                                                  | 21 (4.7%)                        |
| Analgesia                                                    | 19 (4.3%)                        |
| Chemotherapy                                                 | 16 (3.6%)                        |
| TPN                                                          | 15 (3.4%)                        |
| Blood Products                                               | 9 (2.0%)                         |
| Other (Single Occurrence)                                    | 7 (1.6%)                         |
| Amiodarone                                                   | 4 (0.9%)                         |
| Anticoagulants                                               | 4 (0.9%)                         |
| Steroids                                                     | 4 (0.9%)                         |
| Furosemide                                                   | 3 (0.7%)                         |
| Iron                                                         | 3 (0.7%)                         |
| IVIg                                                         | 3 (0.7%)                         |
| Promethazine                                                 | 3 (0.7%)                         |
| Albumin                                                      | 2 (0.4%)                         |
| Dialysate                                                    | 2 (0.4%)                         |
| Mannitol                                                     | 2 (0.4%)                         |
| <b>Site of Occurrence or First Documentation<sup>b</sup></b> |                                  |
| Inpatient Floor                                              | 381 (77.0%)                      |
| Emergency Department                                         | 37 (7.5%)                        |
| Outpatient                                                   | 28 (5.7%)                        |
| Operating Room                                               | 27 (5.5%)                        |
| Outside Hospital                                             | 19 (3.8%)                        |
| Post-Anesthesia Care Unit                                    | 4 (0.8%)                         |

<sup>a</sup>The sum of each variable does not always equal 495 due to omissions in documentation

<sup>b</sup>If the institutional location in which the injury occurred was not specified, the site of first documentation of the infiltration was recorded in its place

## Supplemental

|                                                                                                                                                                                                                                                                            |
|----------------------------------------------------------------------------------------------------------------------------------------------------------------------------------------------------------------------------------------------------------------------------|
| ICD9 Codes<br>999.81: Extravasation of Vesicant Chemotherapy<br>999.82: Extravasation of Other Vesicant Agent                                                                                                                                                              |
| ICD10 Codes<br>T80.81                                                                                                                                                                                                                                                      |
| Keywords<br>IV Extravasation<br>I.V. Extravasation<br>Intravenous Extravasation<br>IV Extrav<br>I.V. Extrav<br>Intravenous Extravasation<br>IV Infiltrate<br>I.V. Infiltrate<br>Intravenous Infiltrate<br>IV Infiltration<br>I.V. Infiltration<br>Intravenous Infiltration |

**Table 1.** Terms included for search using Research Derivative

**Supplemental Figure 1.** Examples of a) Eschar formation and b) Full-thickness wound formation and ulceration after IV infiltration injuries. Images used with permission by Amanda Bailey, NP, and our institution's Department of Plastic Surgery.
